# Supplementary material for: A systematic survey of randomised trials that stopped early for reasons of futility
Source: BMC Med Res Methodol. 2020 Jan 16;20:10. doi: 10.1186/s12874-020-0899-1 (PMC6966801; doi:10.1186/s12874-020-0899-1)
Supplement: Supplementary file 2 — Additional file 2: Table S2. Summary of 52 randomised trials stopped early for futility: selected statistical features [file 12874_2020_899_MOESM2_ESM.xlsx]

## Sheet: Sheet1
Additional Table 2: Summary of 52 randomised trials stopped early for futility: selected statistical features
Author	Planned N (total) a	Type I error rate (α)	1 vs. 2-sided hypothesis testing	Planned study power	Primary outcome type	Outcome variable	Null (or control) value	Design hypothesis: expected treatment outcomes (or effect size)
Beekhuizen	117	0.05	2	0.8	Binary	Manual removal of the placenta	0.44	40% relative reduction
Boggs	100	0.05	1	0.9	Binary	Brain metastasis.	0.4	0.15
Bolliger	360	0.05	2	0.8	Binary	Perioperative myocardial ischaemia	0.45	0.3
Bottiger	1300 b	0.045	2	0.9	Binary	Survival	0.15	0.22
Buchbinder	50 events	0.05	1	0.8	Binary	HIV-1 infections and viral load setpoint (co-primary endpoints)	HR = 1	Relative 60% (HIV-1); 1 log10copies/mL (viral load)
Burgos	180	0.05	2	0.8	Binary	External cephalic version success rate	0.52	0.72
Burnett	400	0.05	1 c	0.85	Binary	Complete remission (at interim analysis) d	0.15	0.3
Carducci	650 events	0.05	2	0.9	Time-to-event	Time to disease progression	HR = 1	HR = 0.77
Carter	190	0.05.	1	0.8	Binary	Development of pancreatic fistula	0.3	0.15
Casey	90 (57 events)	0.2	1	0.7	Time-to-event	Progression-free survival	HR = 1	HR = 0.7
Champlin	224	0.05	2	0.9	Binary	Survival	0.65	0.85
Clemons	120 (100 events)	0.2	1	0.8	Time-to-event	Progression-free survival	HR = 1	HR = 1/1.4
Combs	210	0.049	2	0.8	Binary	Continuation of pregnancy until favourable gestational age	0.3	0.5
Dowson	58	?		0.9	Continuous	Change in cystometric capacity	Zero difference	30% change in mean
Erdmann	19000	0.05	2	0.97	Time-to-event	major adverse CV events	HR = 1	HR = 0.8
Findling	276	0.05	2	0.85	Continuous	Change in psychiatric rating scale	?	Equivalent to median effect seen in other trials
Fleishaker	114	0.05	1	0.81	Binary	ACR20 response rate.	0.3	0.55
Garcia-Manero	75	0.05	2	0.8	Binary	Blood transfusions	0.04	0.3
Gilron	144	0.05	2 e	0.8	Continuous	Cough-evoked pain (0 – 10 scale)	0	1.5 scale points
Haas (TOPIC-1)	626	0.025	1	0.8	Binary	First VTE	0.3	0.2
Haas (TOPIC-2)	626	0.025	1	0.8	Binary	First VTE	0.3	0.2
Haik	Not stated	0.05	2	0.8	Time-to-event	Survival	30% (at 1 year)	0.6
Hennerici	1680	0.05	2	0.9	Binary	Functional success (Barthel Index)	0.35	0.43
Hogg	87	0.05	2	0.8	Continuous	Urine protein-creatinine ratio (UPCR)	Not stated	“Nearly 60% decrease”
Hudson(TIMI)	487	0.05	2	0.8	Binary	TIMI flow grade	TIMI: 45%	TIMI:60%
Hudson(ST)	487	0.05	2	0.8	Binary	ST-segment resolution	0.4	0.55
Jalal	210	0.05	2	0.8	Time-to-event	Median survival	15 (mo.)	25 (mo.)
Juthani-Mehta	828	0.05	2	0.8	Binary	Pneumonia	Not stated	25% relative reduction
Karthaus	84	0.05	2	0.8	Binary	Response rate	0.3	0.6
Kummar	130	?	?	0.88	Binary	Response.	0.15	0.35
Levenick	1398	0.05	2	0.8	Binary	Post-ERCP pancreatitis(PEP)	0.05	0.025
Moreau	200	0.05	1 c	0.8	Binary	Remission	0.25	0.4
Nicholls	6500	0.05	2	0.8	Time-to-event	Composite of cardiovascular events	HR = 1	HR = 0.75
Opal	2522	0.05	2	0.8	Binary	All-cause mortality	0.24	20% relative reduction
Park	60	0.05	2	0.91	Binary	Depression Rating Scale	0.2	0.6
Philipp	620	0.05	?	?	Binary	All-cause mortality + cardiovascular morbidity + graft failure	0.29	0.39
Powers	354	0.05	2	0.9	Time-to-event	Stroke + deaths at 2 yrs.	0.4	0.24
Powles	120	0.1	2	0.8	Time-to-event	Progression-free survival	HR = 1	HR = 0.6
Rees	208	0.05	2	0.9	Binary	Survival	0.22	0.42
Roehr	72 events	?	?	?	Binary	Infections	Not stated	Not stated
Sacktor	157	0.1	?	0.85	Continuous	NPZ-8 score	0	Standardised effect = 0.71
Schadendorf	190	0.05	1	0.8	Binary	Objective response	0.15	0.3
Schnabel	300 f	0.025	1	?	Continuous	Change in FEV1 from baseline	?	?
Schumacher	200	0.05	2	0.8	Continuous	Visual acuity	OR = 1	OR = 2.2
Simons	1000	0.05	2	0.9	Binary	ICU-acquired delirium	0.4	0.3
Smolen	Not stated; (3 group study)	0.05	2	?	Continuous	3 co-primary rheumatology scales	?	?
Strasser (1)	201	0.05	2	0.9	Continuous	Appetite change, visual analogue scale(VAS)	0	7mm, SD=15mm
Strasser (2)	201	0.05	2	0.9	Continuous	Appetite change, visual analogue scale(VAS)	0	7mm, SD=15mm
Tilley	1741	0.05	2	60%-90%	Binary	% of diverse participants recruited	0.09	0.184
Torgano	273	0.05	1	0.8	Binary	NIHSS and mRS scores	NIHSS: 40%	NIHSS: 55%
Wadhwa	1276	0.05	1	0.9	Binary	Major complications	Not stated	25% relative reduction
Willson	1080	0.05	2	0.8	Binary	All-cause mortality at 90 days	0.25	0.18
a: Planned sample size N in number of patients, unless otherwise noted.
b: Sample size recalculated after an interim analysis.
c: 1- or 2-sided testing unclear. 1-sided testing assumed.
d: Study uses a different variable (overall survival) for final analysis.
e: Two-sided testing assumed.
f: Sample size recalculated after a second interim analysis.
HR: hazard ratio; OR: odds ratio; SD: standard deviation.
